# Supplementary material for: Tumor infiltrating lymphocytes (TIL) therapy in metastatic melanoma: boosting of neoantigen-specific T cell reactivity and long-term follow-up
Source: PubMed Central journal article supplement — J Immunother Cancer. 2020 Aug 4;8(2):e000848. doi: 10.1136/jitc-2020-000848 (PMC7406109; doi:10.1136/jitc-2020-000848), 2020-08-04
Supplement: jitc-2020-000848supp001.pdf [file jitc-2020-000848supp001.pdf]

**Supplementary Figure 1:** polyfunctionality of reactive T cells in TIL infusion products.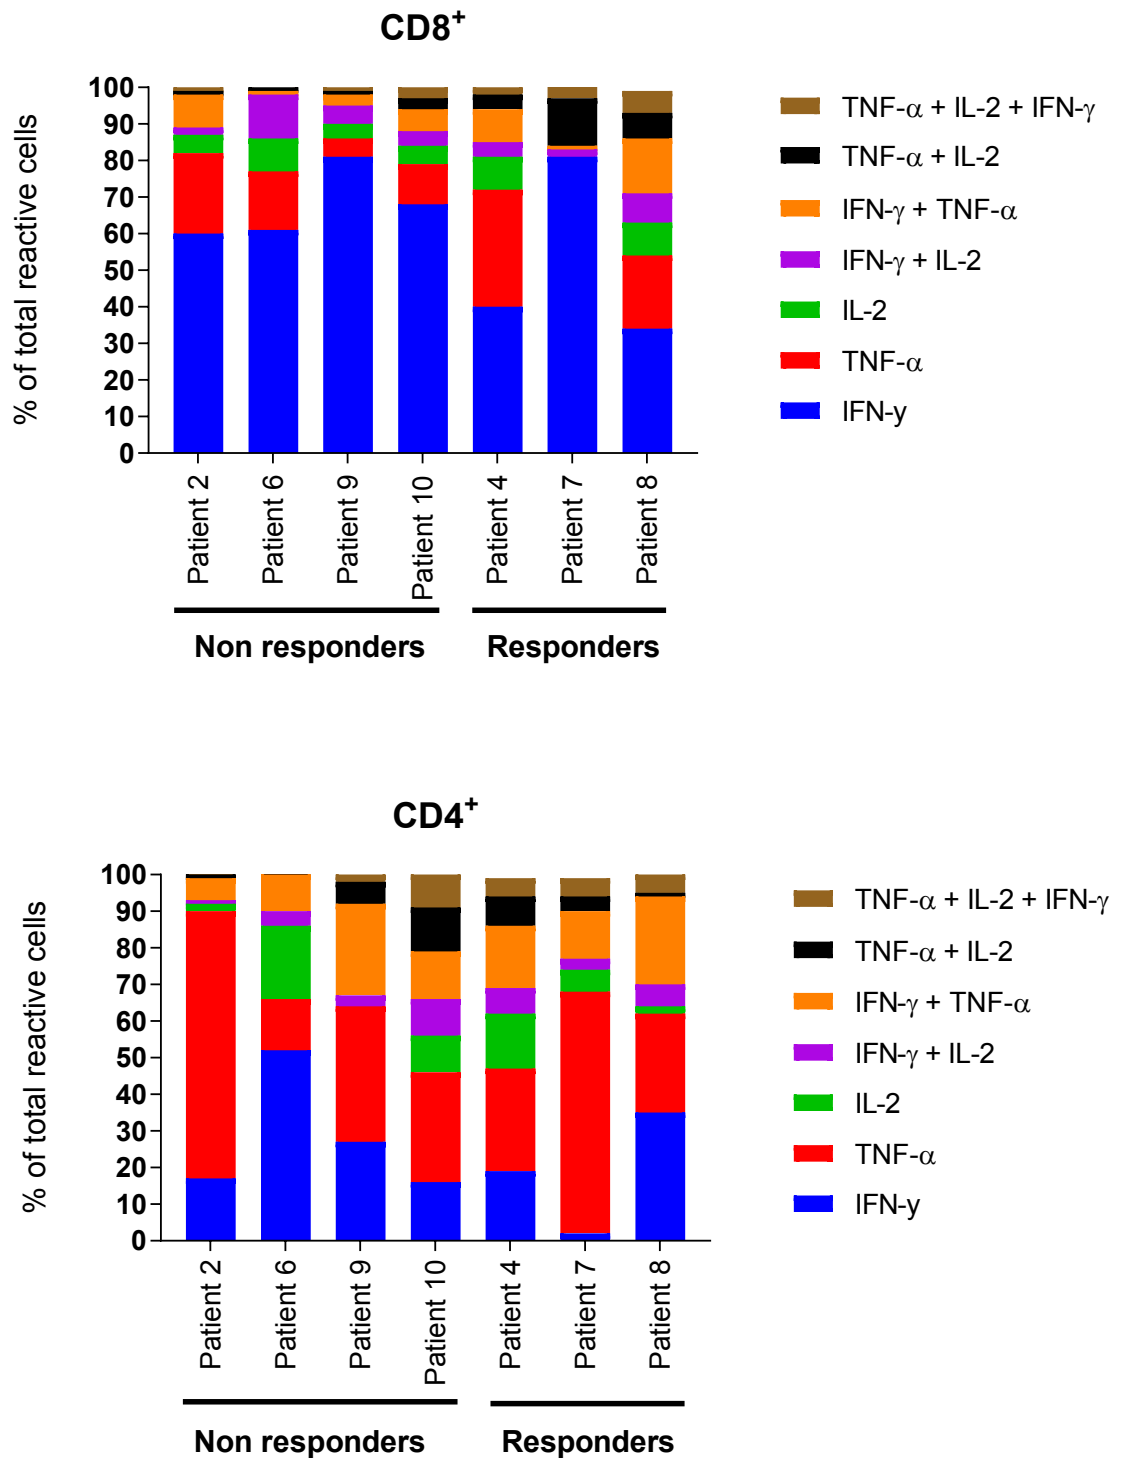

A total of  $2 \times 10^5$  TILs were cultured with  $2 \times 10^5$  cells from tumor digest or tumor cell lines, in the presence of  $1 \mu\text{L/mL}$  Golgiplug (BD Biosciences). After 5 hours of incubation, cells were stained using anti-CD8 antibody (clone SK1, BD Biosciences) and live/dead marker (Fixable Violet Dead Cell Stain Kit, (Invitrogen)). Intracellular cytokine production was detected after fixation and permeabilization with a Cytotfix/Cytoperm kit (BD Biosciences) and antibodies against IFN- $\gamma$  (clone B27), IL-2 (clone Mq1-17H12), and TNF $\alpha$  (clone Mab11), all from BD Biosciences. Cells were analyzed on a LSR2 SORP flow cytometer and data was processed using Flowjo\_V10 software.
