# Supplementary material for: Tumor infiltrating lymphocytes (TIL) therapy in metastatic melanoma: boosting of neoantigen-specific T cell reactivity and long-term follow-up
Source: PubMed Central journal article supplement — J Immunother Cancer. 2020 Aug 4;8(2):e000848. doi: 10.1136/jitc-2020-000848 (PMC7406109; doi:10.1136/jitc-2020-000848), 2020-08-04
Supplement: jitc-2020-000848supp002.pdf [file jitc-2020-000848supp002.pdf]

**Supplementary Figure 2:** phenotype of neoantigen-specific CD8<sup>+</sup> T cells and bulk CD8<sup>+</sup> T cells in infusion products and blood in patient 4.

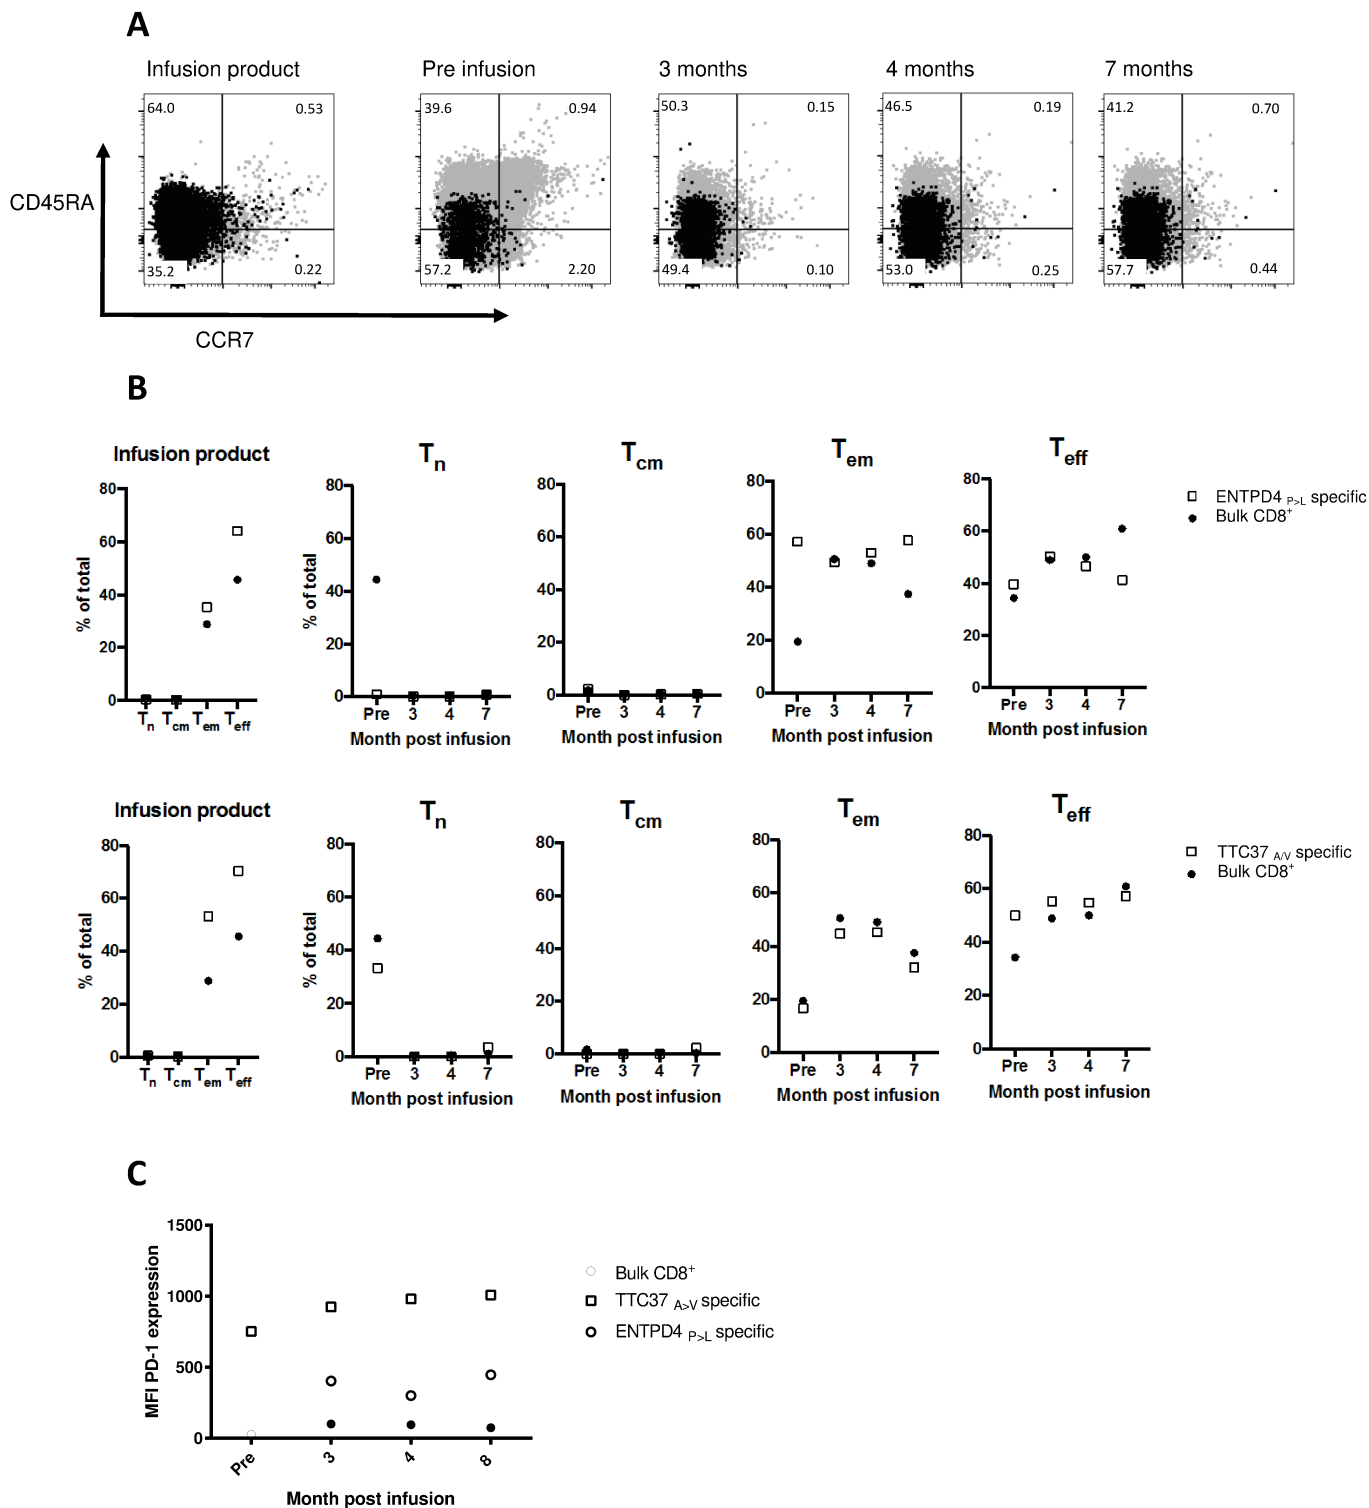

(A) Representative flow-cytometry plots of phenotypic markers for bulk CD8<sup>+</sup> T cells (grey dots) and CD8<sup>+</sup> multimer<sup>+</sup> ENTPD4<sub>p>L</sub> directed T cells (black dots). Number is the % of CD8<sup>+</sup> ENTPD4<sub>p>L</sub> directed T cells for each quadrant. (B) % of cells for each differentiation state (Naïve, Central memory, Effector memory and Effector T cells) of the bulk CD8<sup>+</sup> T cells and CD8<sup>+</sup> multimer<sup>+</sup> T cells. (C) PD-1 expression on bulk CD8<sup>+</sup> cells and CD8<sup>+</sup> multimer<sup>+</sup> T cells in peripheral blood. Cells were analyzed on a LSR2 SORP flow cytometer and data was processed using Flowjo\_V10 software.

### Supplementary Figure 3: phenotype of neoantigen-specific CD8<sup>+</sup> T cells and bulk CD8<sup>+</sup> T cells in infusion products and blood in patient 8.

#### A

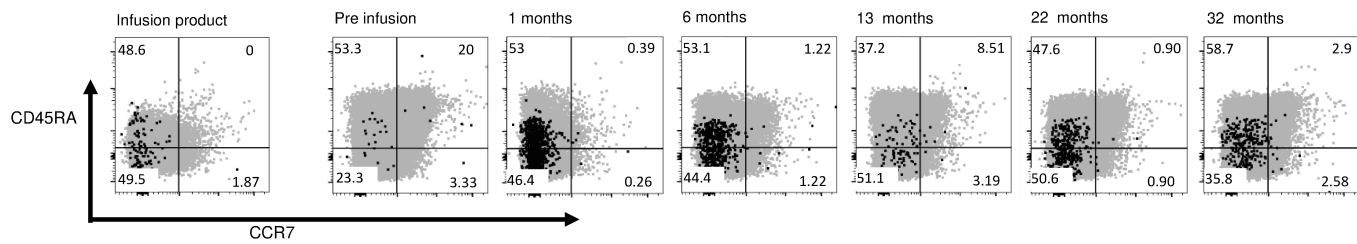

#### B

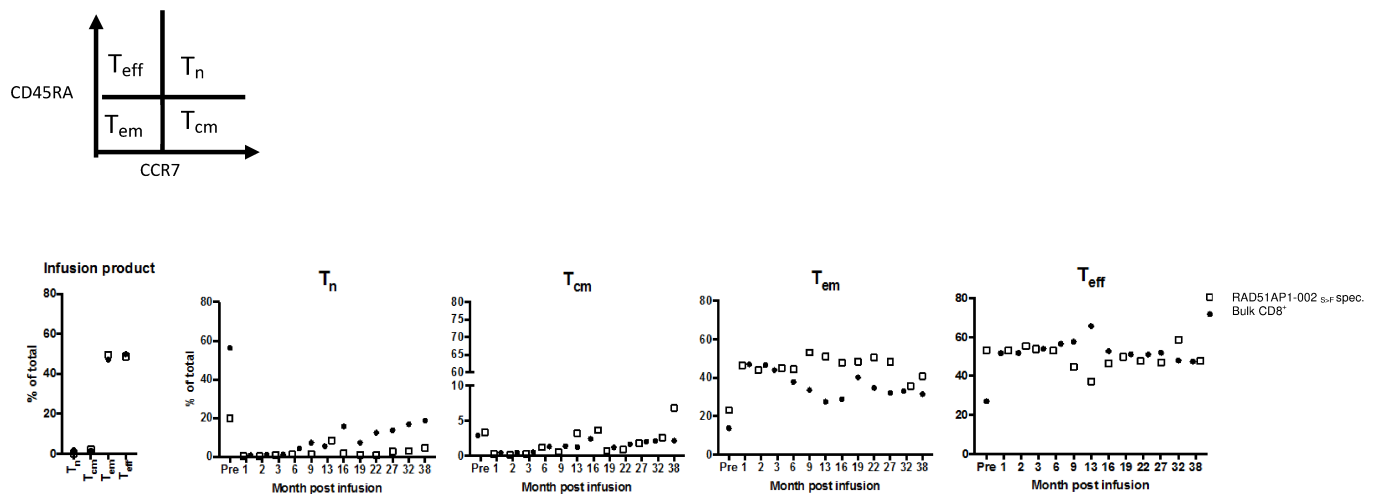

#### C

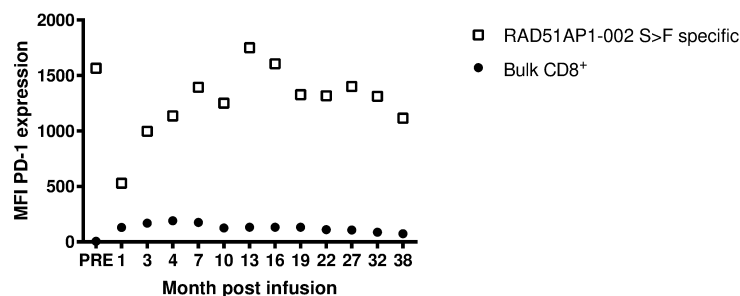

(A) Representative flow-cytometry plots of phenotypic markers for bulk CD8<sup>+</sup> T cells (grey dots) and CD8<sup>+</sup> multimer<sup>+</sup> RAD51AP1-002<sub>S>F</sub> directed T cells (black dots). Number is the % of CD8<sup>+</sup> RAD51AP1-002<sub>S>F</sub> directed T cells for each quadrant. (B) % of cells for each differentiation state (Naïve, Central memory, Effector memory and Effector T cells) of the bulk CD8<sup>+</sup> T cells and CD8<sup>+</sup> multimer<sup>+</sup> RAD51AP1-002<sub>S>F</sub> directed T cells. (C) PD-1 expression on bulk CD8<sup>+</sup> cells and CD8<sup>+</sup> multimer<sup>+</sup>, RAD51AP1-002<sub>S>F</sub> directed T cells in peripheral blood. Cells were analyzed on a LSR2 SORP flow cytometer and data was processed using Flowjo\_V10 software.
